# Supplementary material
Source: publisher figshare collection journal article supplement (https://acs.figshare.com/ndownloader/files/3739213)
Supplement: Supplementary file 1 [file 3739213]

Conformation of Crystalline and Noncrystalline  
Domains in [3- $^{13}\text{C}$ ]Ala, [3- $^{13}\text{C}$ ]Ser, and [3- $^{13}\text{C}$ ]Tyr-  
*Bombyx mori* Silk Fibroin in a Hydrated State  
studied with  $^{13}\text{C}$  DD/MAS NMR

*Tetsuo Asakura,\* Kotaro Isobe, Akihiro Aoki, and Shunsuke Kametani*

Department of Biotechnology, Tokyo University of Agriculture and Technology,

Koganei, Tokyo 184-8588 Japan

\* To whom correspondence should be addressed (Tel & Fax, 81-42-383-7733) email: (TA)  
asakura@cc.tuat.ac.jp

# Supporting Information

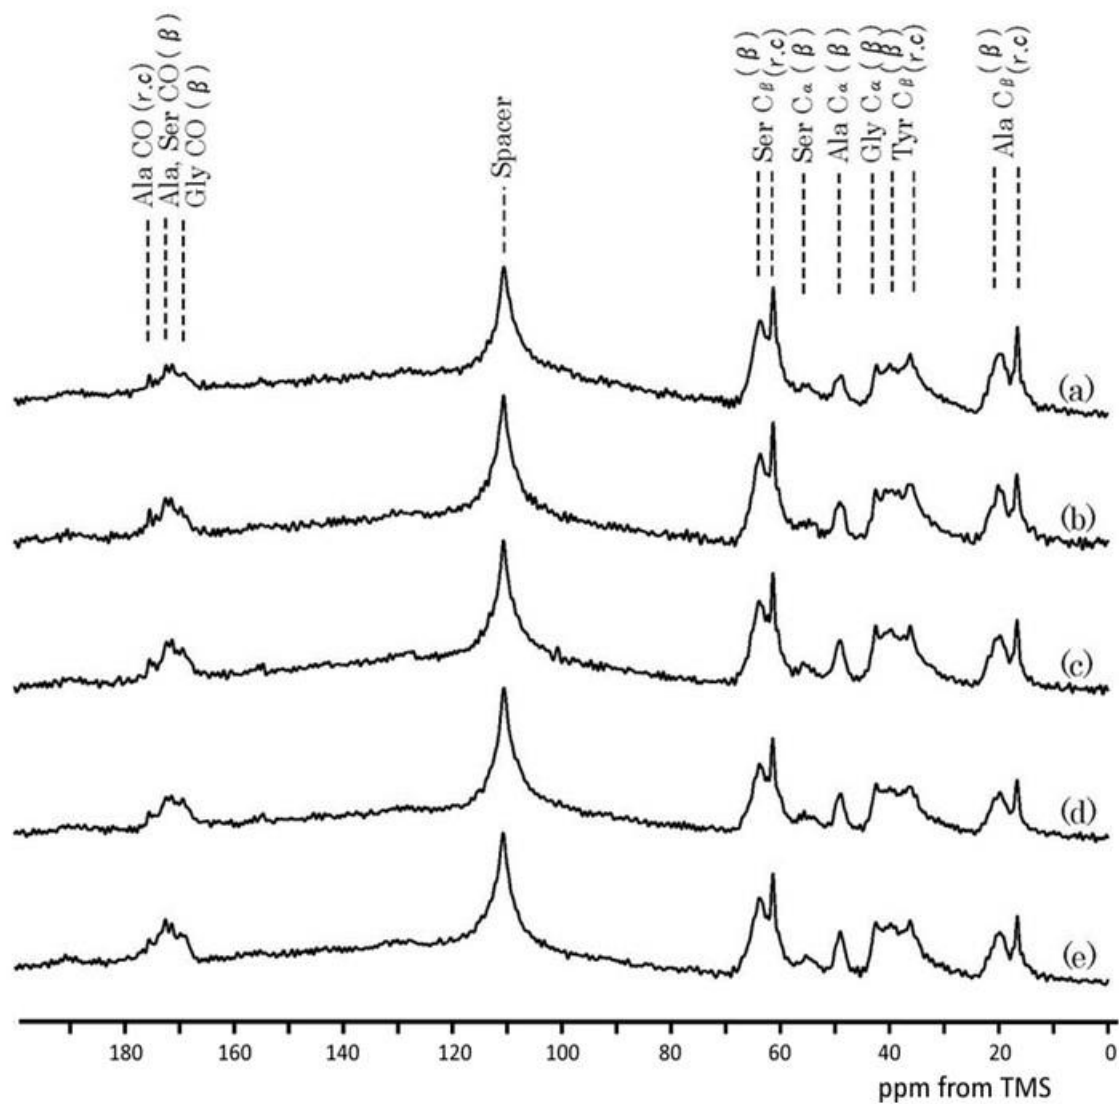

Figure S-1  $^{13}\text{C}$  DD/MAS spectra of  $^{13}\text{C}$  labeled *B. mori* silk fibroin fiber in a wet state observed with different recycle delay, (a)4s (b)10s (c)15s (d)20s and (e)25s.

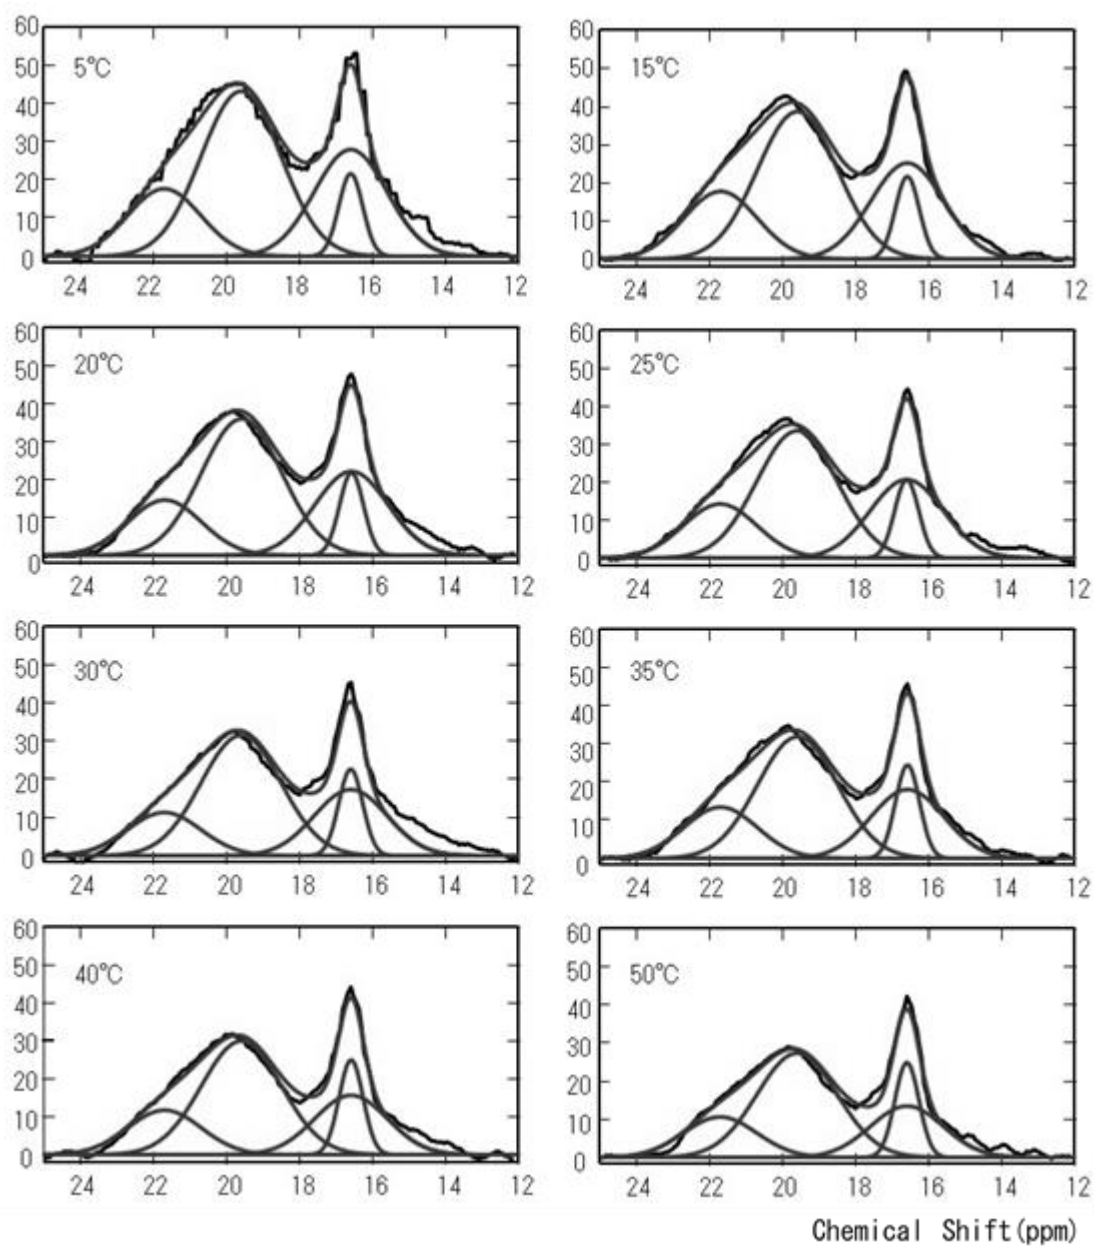

Figure S-2 Simulations of Ala C $\beta$  peaks observed as a function of temperature ( 5°C to 50°C).

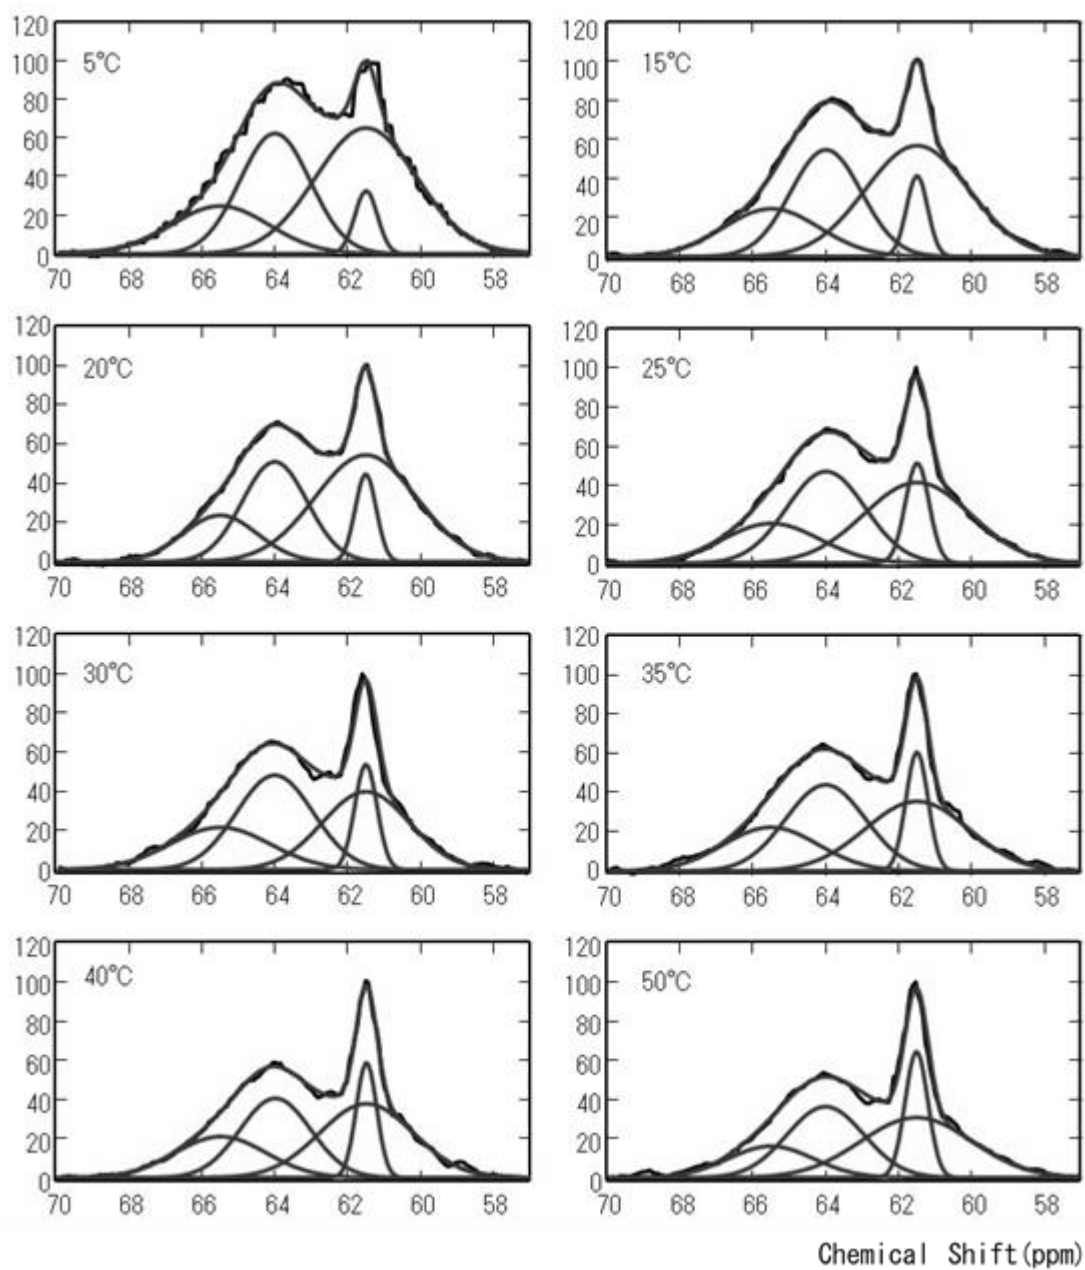

Figure S-3 Simulations of Ser C $\beta$  peaks observed as a function of temperature ( 5°C to 50°C).

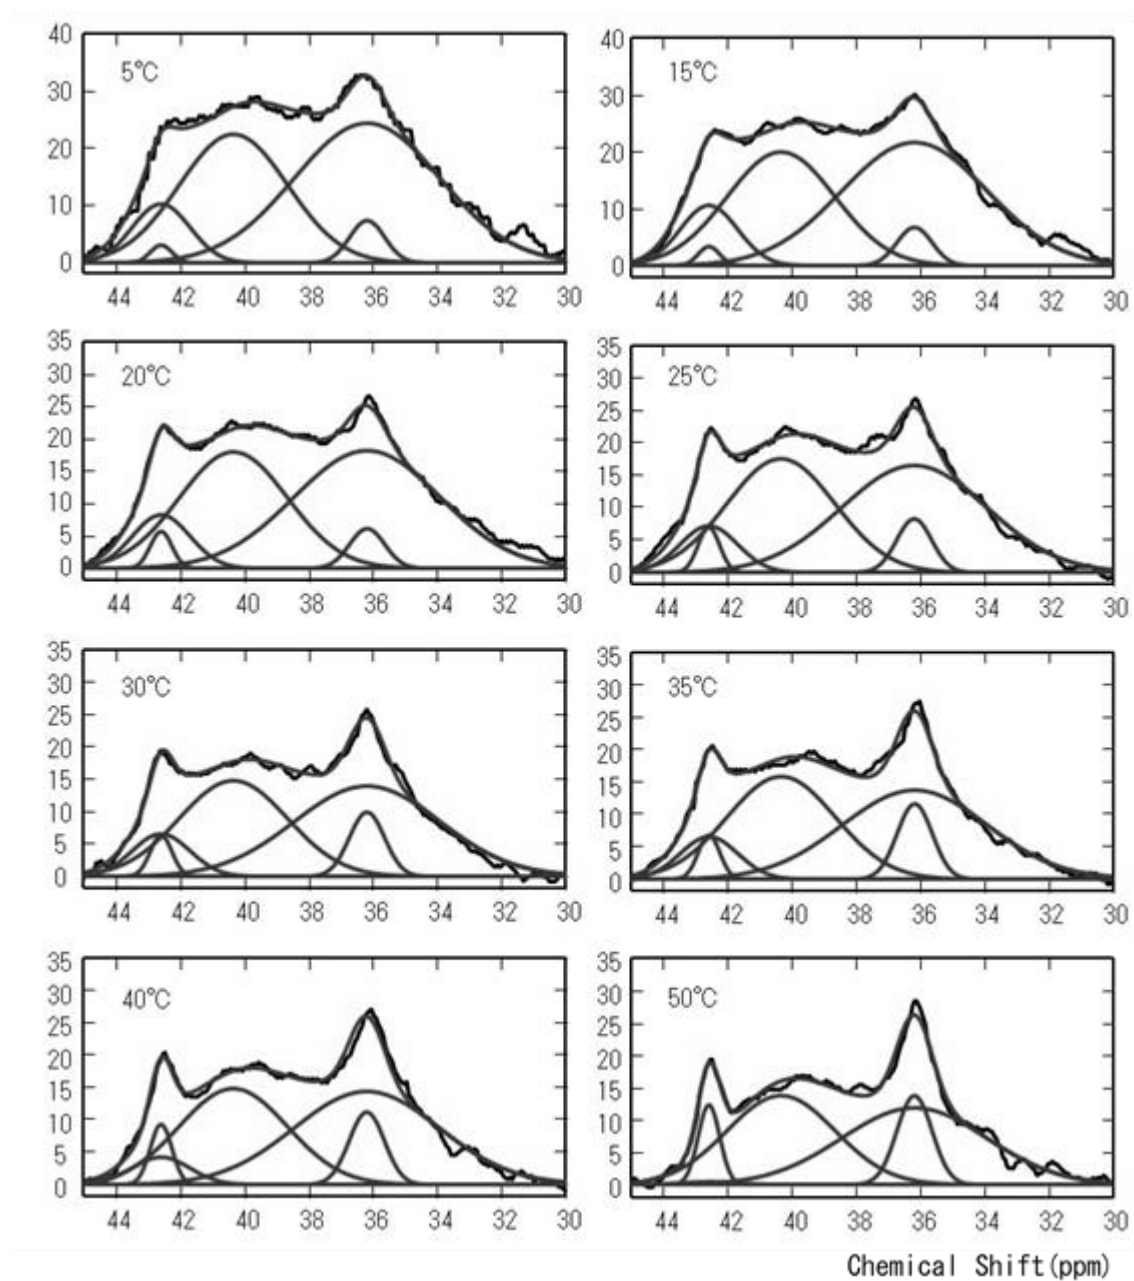

Figure S-4 Simulations of Tyr C $\beta$  peaks observed as a function of temperature ( 5°C to 50°C).

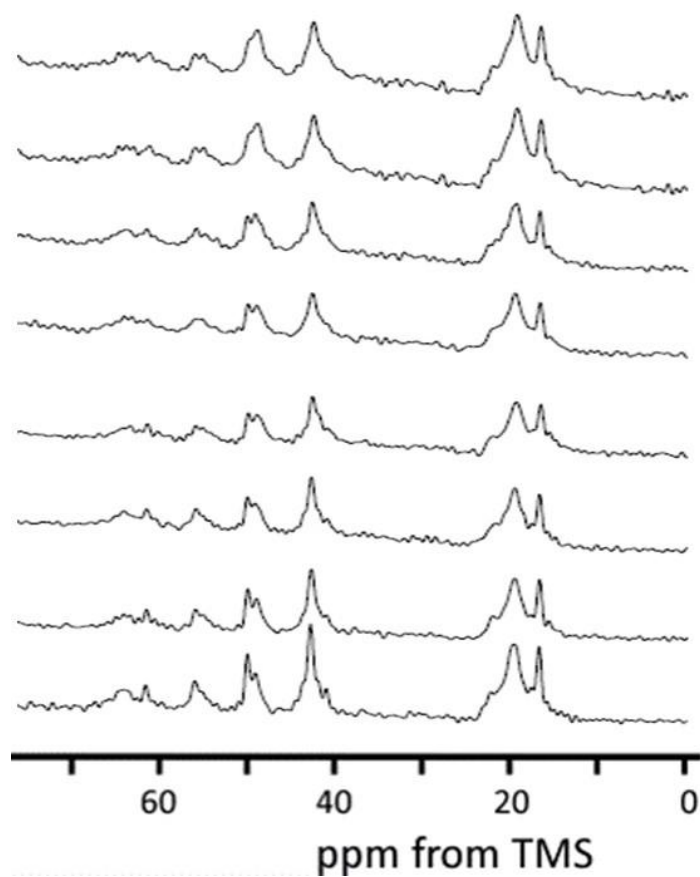

Figure S-5 Temperature dependence of  $^{13}\text{C}$  DD/MAS NMR spectra of  $[\text{U}-^{13}\text{C}]$  crystalline fraction powder of *B. mori* silk fibroin in a wet state observed at (a)5°C, (b)15°C, (c)20°C, (d)25°C, (e)30°C, (f)35°C, (g)40°C and (h)50°C.

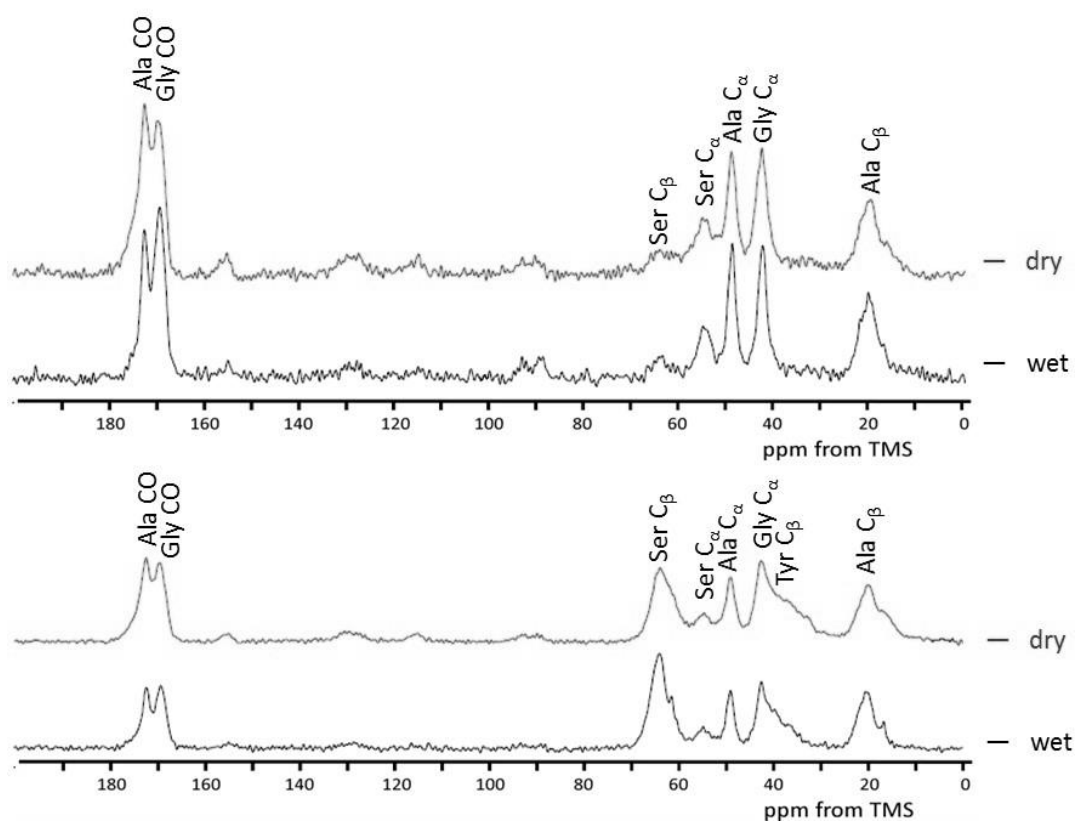

Figure S-6  $^{13}\text{C}$  CP/MAS NMR spectra of non-labeled (upper two spectra) and  $[3-^{13}\text{C}]\text{Ala}$ ,  $[3-^{13}\text{C}]\text{Ser}$  and  $[3-^{13}\text{C}]\text{Tyr-}B. \text{mori}$  silk fibroin fiber (lower two spectra) in dry and in a wet state.
